# Supplementary material for: Domain configurations in Co/Pd and L10-FePt nanowire arrays with perpendicular magnetic anisotropy
Source: Royal Society of Chemistry journal article supplement (doi:10.1039/c5nr08865h), 2016-01-01
Supplement: c5nr08865h1.pdf [file c5nr08865h1.pdf]

## Supporting Information

### Domain Configurations in Co/Pd and $L1_0$ -FePt Nanowire Arrays with Perpendicular Magnetic Anisotropy

*Pin Ho,\* Kun-Hua Tu, Jinshuo Zhang, Congli Sun, Jingsheng Chen, George Lontos, Konstantinos Ntetsikas, Apostolos Avgeropoulos, Paul M. Voyles, Caroline A. Ross*

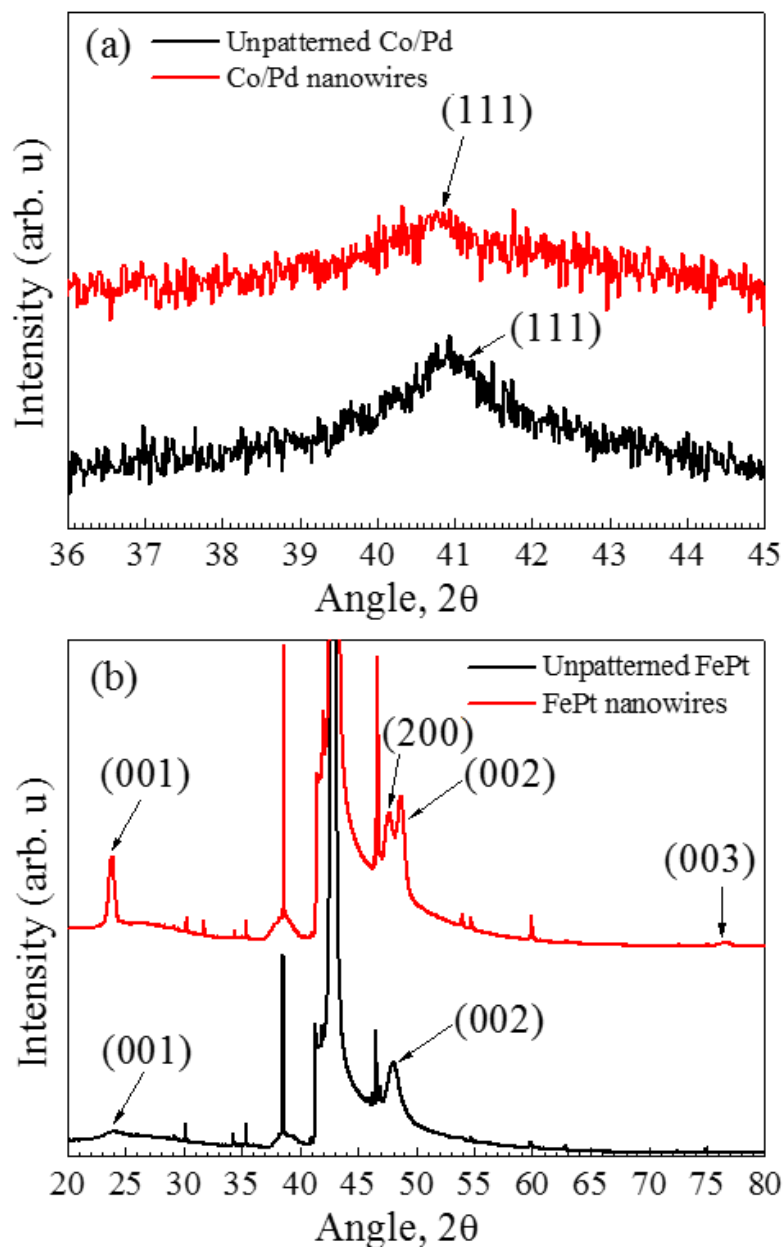

**Figure S1:** XRD spectrum of (a) Co/Pd before and after BCP patterning (b)  $L1_0$ -FePt before and after BCP patterning. The unlabelled sharp peaks in (b) are inherent to the MgO substrate.

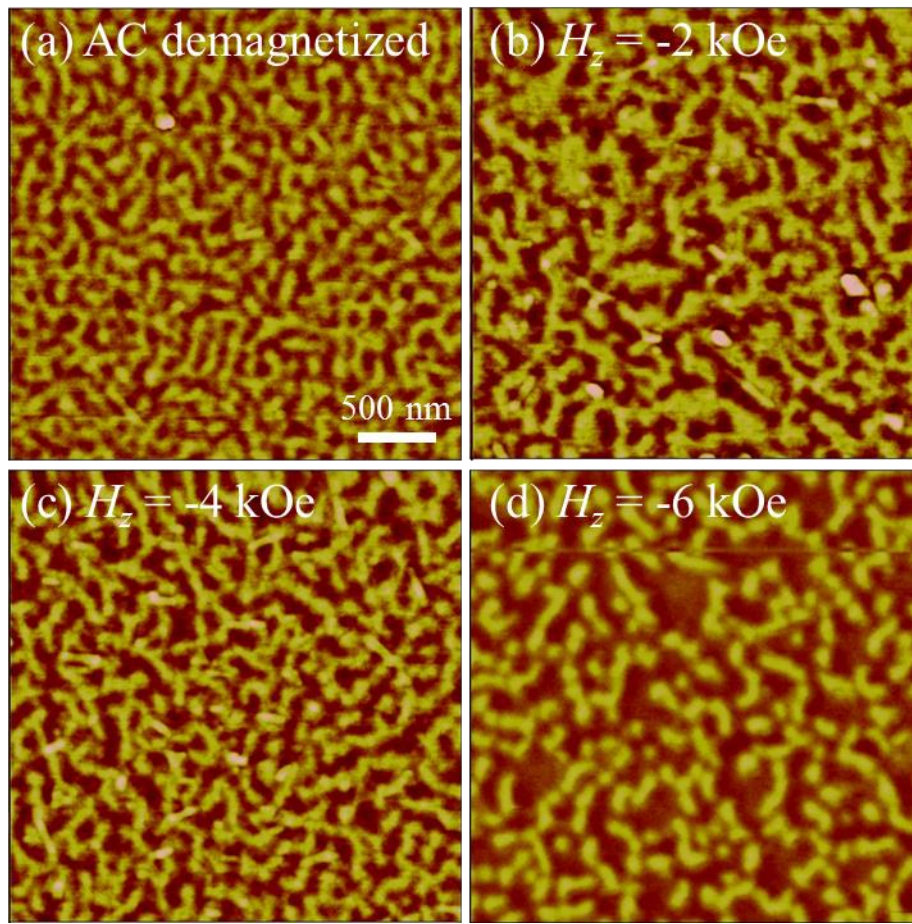

**Figure S2:** MFM images of unpatterned  $L1_0$ -FePt (a) after ac-demagnetization and (b-d) at remanence after an applied field of  $H_z =$  (b) -2, (c) -4, and (d) -6 kOe. Red and yellow contrast in the MFM images indicate 'up' and 'down' magnetization, with the red domains favored by the negative applied field.
